# Supplementary material for: On paper characterisation of droplet and evaporation study using impedance spectroscopy
Source: Royal Society of Chemistry journal article supplement (doi:10.1039/d4ay00303a), 2024-01-01
Supplement: d4ay00303a1.pdf [file d4ay00303a1.pdf]

## Supporting information

### On paper characterisation of droplet and evaporation study using impedance spectroscopy

O Kare Siva Prakasam<sup>\*1</sup>, Akashlina Basu<sup>1</sup>, Koel Chaudhury<sup>2</sup>, Soumen Das<sup>1</sup>

<sup>1</sup>BioMEMS Laboratory, School of Medical Science and Technology, Indian Institute of Technology Kharagpur, India

<sup>2</sup>Clinical biomarker Laboratory, School of Medical Science and Technology, Indian Institute of Technology Kharagpur, India

\*Corresponding author: sivaok@ieee.org\

#### S1. Fabrication of paper chip for an evaporation study

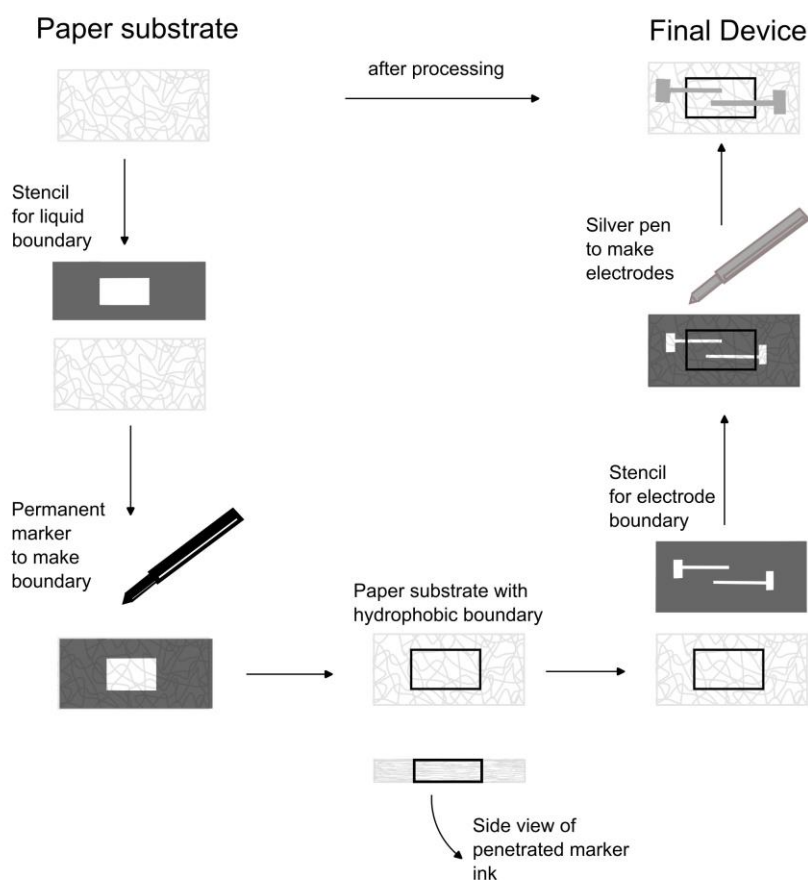

Scheme. 1 Design and fabrication of a paper chip for the droplet analysis.
